# Supplementary material for: Impact of oxygen defects on a ferromagnetic CrI3 monolayer
Source: PubMed Central journal article supplement — RSC Adv. 2020 Nov 23;10(69):42493–501. doi: 10.1039/d0ra08153a (PMC9058019; doi:10.1039/d0ra08153a), 2020-11-23
Supplement: RA-010-D0RA08153A-s001.pdf [file RA-010-D0RA08153A-s001.pdf]

## Electronic Supplementary Information (ESI) for

### **Impact of oxygen defects on ferromagnetic CrI<sub>3</sub> monolayer**

Batjargal Sainbileg, ‡<sup>ab</sup> Erdembayalag Batsaikhan ‡<sup>ab</sup> and Michitoshi Hayashi\*<sup>ab</sup>

<sup>a</sup>Center for Condensed Matter Sciences, National Taiwan University, Taipei 106, Taiwan.

<sup>b</sup>Center of Atomic Initiative for New Materials, National Taiwan University, Taipei 106, Taiwan.

‡ These authors contributed equally.

\*Corresponding author e-mail: [atmyh@ntu.edu.tw](mailto:atmyh@ntu.edu.tw)

## Table of Contents

**Scheme S1.** Illustration of calculations for binding energy per oxygen.

**Scheme S2.** Illustration of calculations for formation energy of O-defective CrI<sub>3</sub> monolayers.

**Fig. S1.** Ab initio Molecular dynamical (AIMD) calculations of O-defective CrI<sub>3</sub> monolayers.

**Fig. S2.** Possible magnetic configurations of CrI<sub>3</sub> monolayer.

**Fig. S3.** Schematic illustration of Cr orbitals and the corresponding magnetic exchanges.

**Fig. S4.** Band-gap reduction in the minority spin channel of band structure.

**Fig. S5.** Band-decomposed partial charge density of all investigated CrI<sub>3</sub> monolayers.

**Fig. S6.** 3D and 2D contour plots of the charge density for O-attached CrI<sub>3</sub>.

**Fig. S7.** 3D and 2D contour plots of the charge density for O-doped CrI<sub>3</sub>.

**Fig. S8.** Electron localization function (ELF) profile of all investigated CrI<sub>3</sub> monolayers.

**Table. S1** Bond Length and the bond angle between other Cr- I (O) around the reference unit.

## Reference

## Details of binding and formation energies

In the main text, we have used the spin-polarized PBE functional including both plus +U method and van der Waals D3 corrections (PBE+U-D3), in order to predict 3d states accurately and obtain a reliable structure for investigating the magnetic and electronic properties of the present CrI<sub>3</sub> monolayers. The binding energy per oxygen atom and formation energies of defective monolayers are also estimated in terms of PBE+U-D3 accordingly and our results are consistent with the trend of TMDs with single atomic defects.<sup>S1-S2</sup> In particular, Dobrota et al<sup>S1</sup> have shown that the binding energy of a non-metallic single dopant on the graphene is large, ranging from -7.3 eV to -15.5 eV. Moreover, Dabral et al<sup>S2</sup> have reported that an oxygen atomic defect on common 2D TMDs has large binding energy (-7.5 eV to -11 eV) whose values of a single-oxygen-atomic defect are much larger than the binding energy of H<sub>2</sub>O and O<sub>2</sub> molecules on those 2D TMDs.

In this ESI, in order to compare with the early literature devoting to some well-known 2D materials, we also have calculated of binding per oxygen atom and formation energies of present CrI<sub>3</sub> monolayers, with similar computational conditions in the literature<sup>S3-S4</sup>, without the plus +U functional and vdW D3 corrections. As a result, we found that binding energy per oxygen atom and formation energies on defective CrI<sub>3</sub> are obviously different with and without the plus +U functional and vdW D3 corrections. The simulated values with different methods are given in Scheme 1 and Scheme 2, together with the calculation steps. Our finding is consistent with a trend in the previous literature that the binding and formation energies strongly depend on the selected functional.<sup>S5-S6</sup>

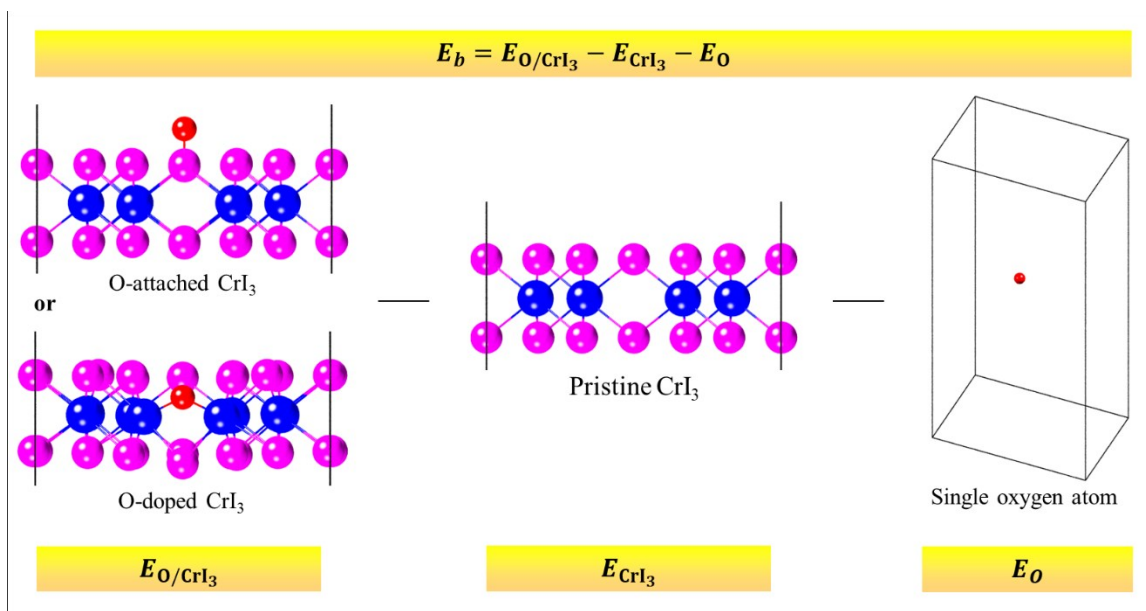

**Scheme S1.** Illustration of calculations for the binding energy per an oxygen atom on defective CrI<sub>3</sub> monolayers. Note that binding energies are -9.4 eV (PBE+U-D3) and -0.14 eV (PBE) for O-attached CrI<sub>3</sub> while binding energies are -9.6 eV (PBE+U-D3) and -1.76 eV (PBE) for O-doped CrI<sub>3</sub>.

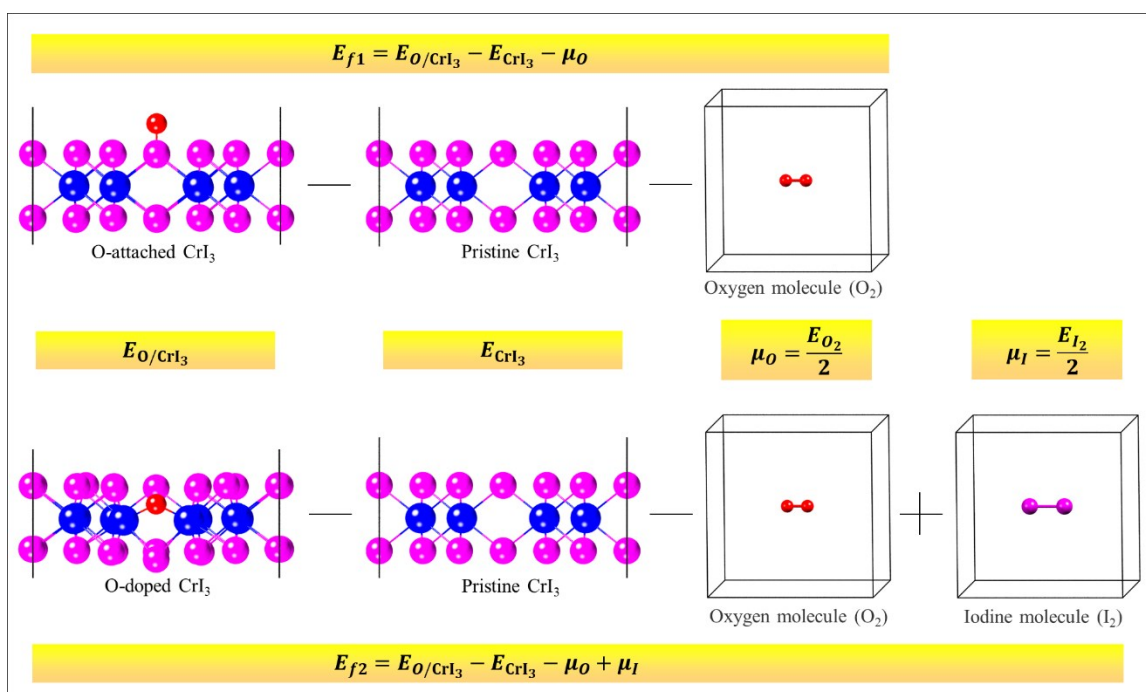

**Scheme S2.** Illustration of calculations for the formation energy of defective CrI<sub>3</sub> monolayers. Formation energies are -6.4 eV (PBE+U-D3) and -0.14 eV (PBE) for O-attached CrI<sub>3</sub> while formation energies are -7.9 eV (PBE+U-D3) and -1.69 eV (PBE) for O-doped CrI<sub>3</sub>.

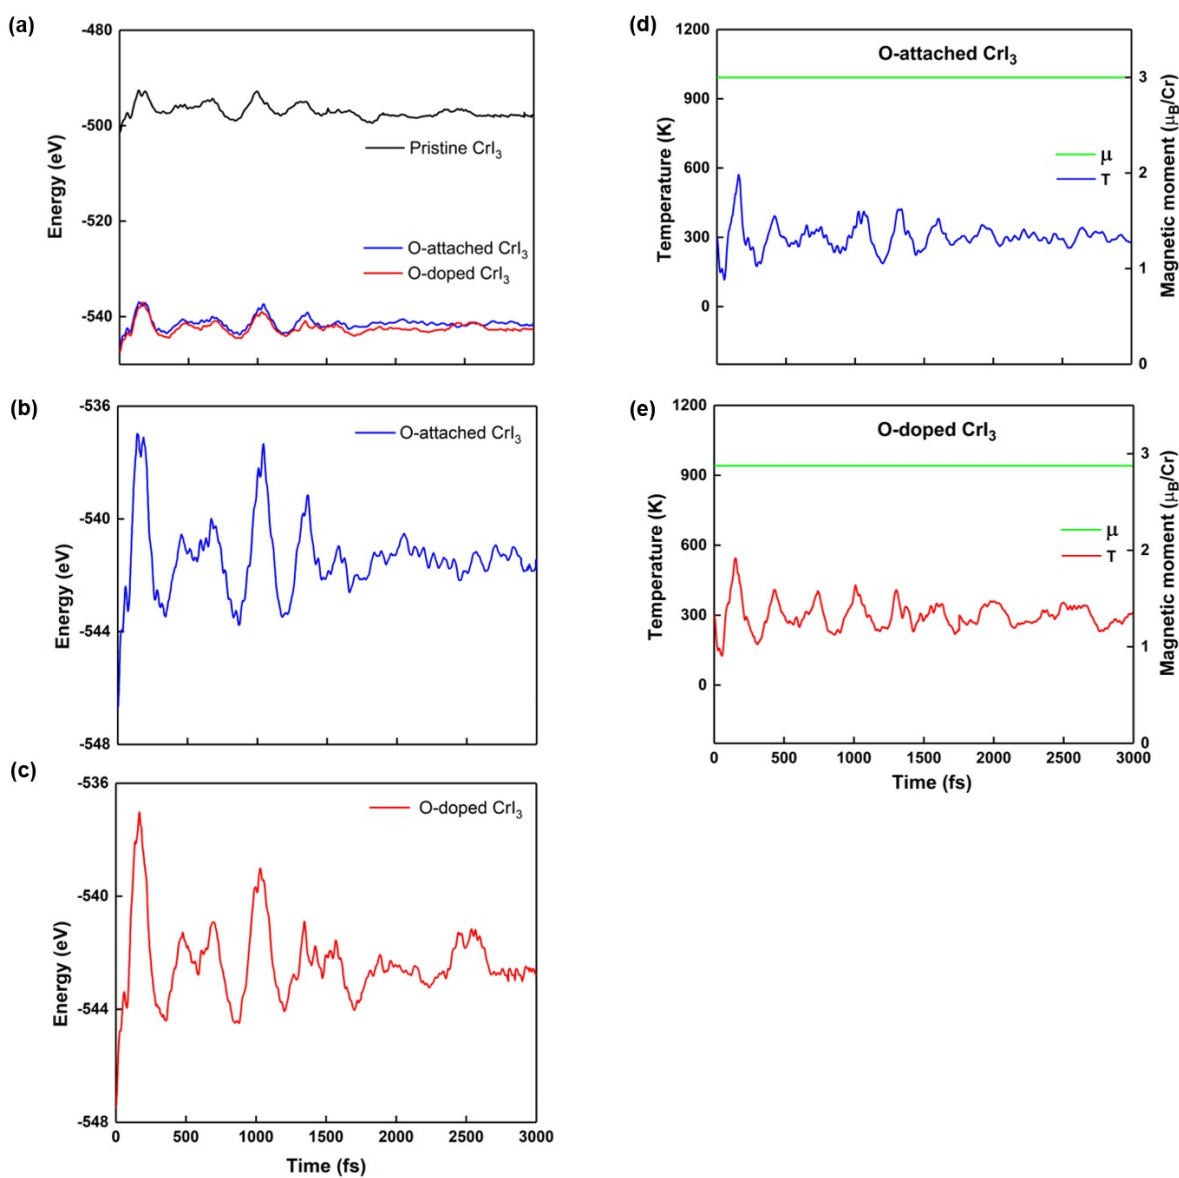

**Fig. S1.** (a) Calculated AIMD evolutions of energy for O-attached (blue) and O-doped (red) CrI<sub>3</sub> monolayers comparing with pristine CrI<sub>3</sub> (black), being thermally more favorable than pristine CrI<sub>3</sub> monolayer. The enlarged graphs with an adequate scale of the vertical axis of (b) O-attached and (c) O-doped CrI<sub>3</sub> monolayer are plotted, respectively. (d-e) Temperature (right Y-axis) and magnetic moment (left Y-axis) for the defective monolayers. Remarkably, the time-evolutions of the magnetic moment maintain constant during AIMD simulations (see green line in Fig. S1d and Fig.S1e).

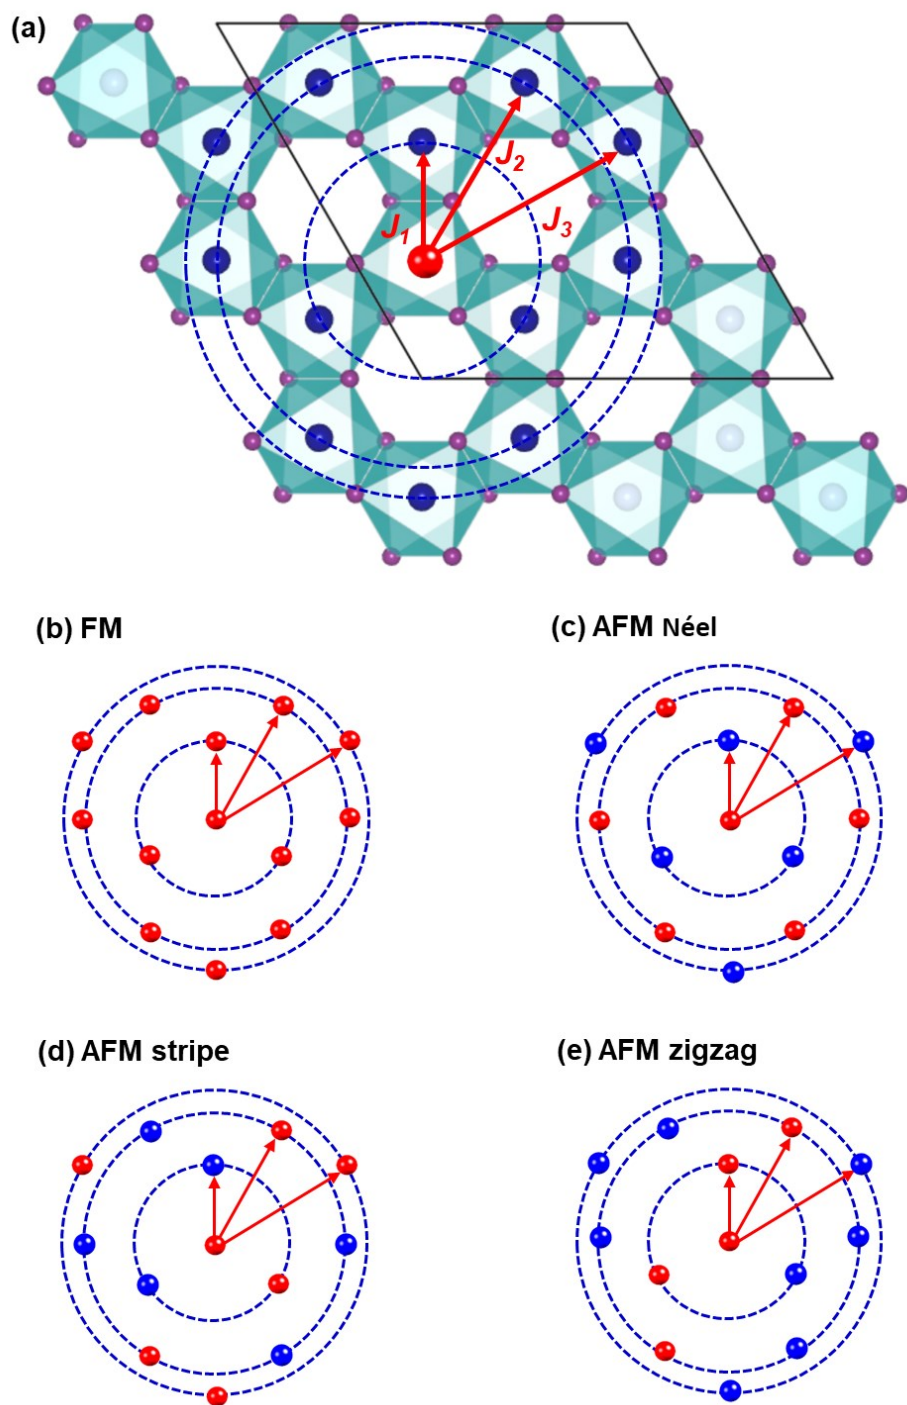

**Fig. S2.** (a) Schematic view of possible exchange interaction paths between Cr ions in CrI<sub>3</sub> monolayer;  $J_1$ ,  $J_2$ , and  $J_3$  represent exchange interactions in the 1st-, 2nd-, and 3th- nearest-neighbors (NN) while the dashed circles illustrate the horizon of each path. (b-e) The possible magnetic configurations of CrI<sub>3</sub> monolayer. The red (blue) ball depicts the spin-up (spin-down).

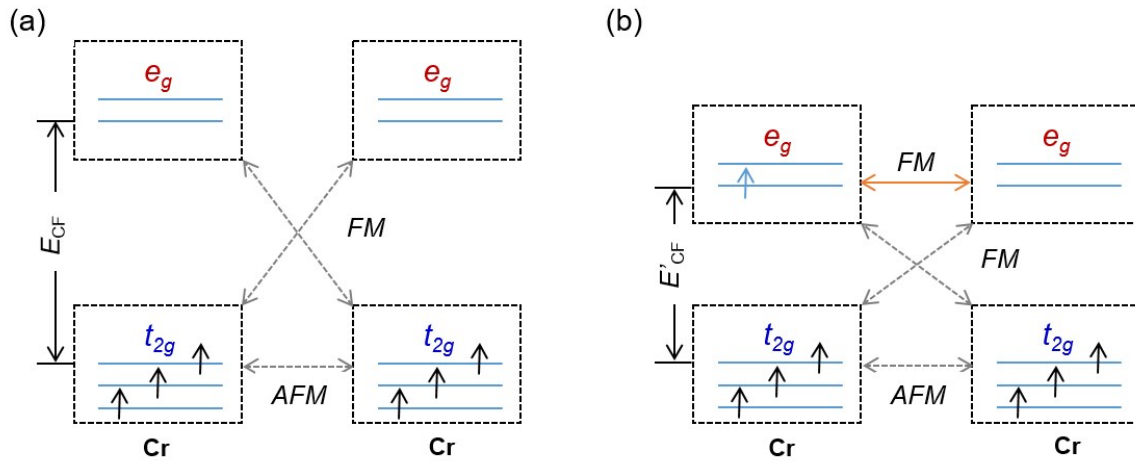

**Fig. S3.** Schematic illustration<sup>S7</sup> of Cr orbitals and the corresponding magnetic exchanges in (a) pristine  $\text{CrI}_3$  and (b) O-doped  $\text{CrI}_3$ . Herein,  $E_{\text{CrF}}$ ,  $E'_{\text{CrF}}$ , FM, and AFM stand for the crystal-field, reduced crystal-field, ferromagnetic exchange, and antiferromagnetic exchange while the dashed and solid arrow lines represent possible virtual and real hopping, respectively.

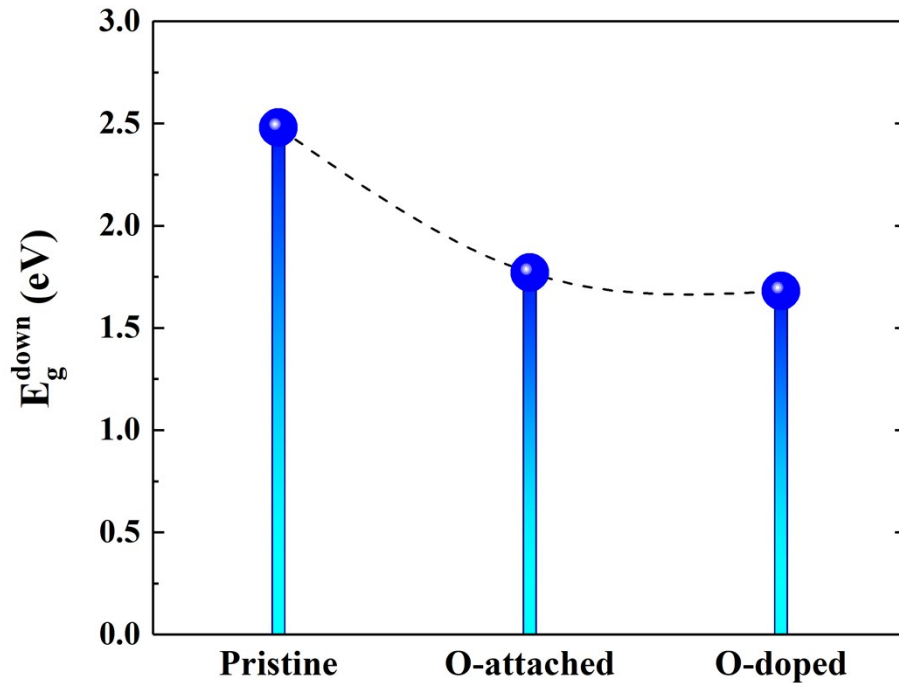

**Fig. S4.** Band-gap reduction in the minority ( $\downarrow$ ) spin channel of band structure for defective  $\text{CrI}_3$  with respect to that of pristine monolayer.

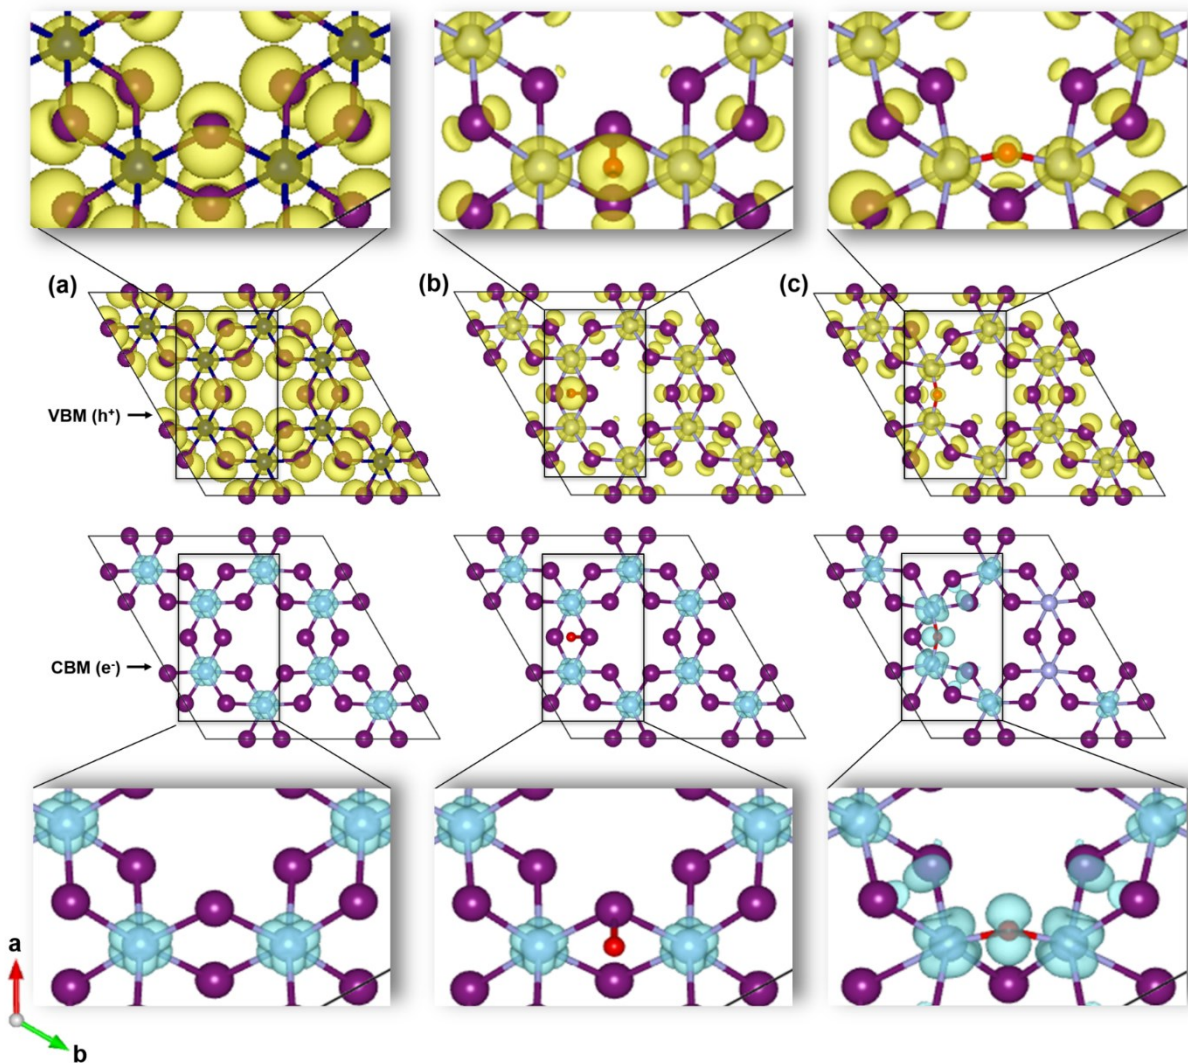

**Fig. S5.** Isosurfaces for the band-decomposed partial charge density of VBM (top panel) and CBM (bottom panel) of (a) pristine, (b) O-attached, and (c) O-doped CrI<sub>3</sub> monolayer, respectively, where the cyan (yellow) isosurfaces represent the distribution of electrons (holes) charge density at the CBM (VBM). The black box depicts the zoomed-in view of the unit selected from the monolayer.



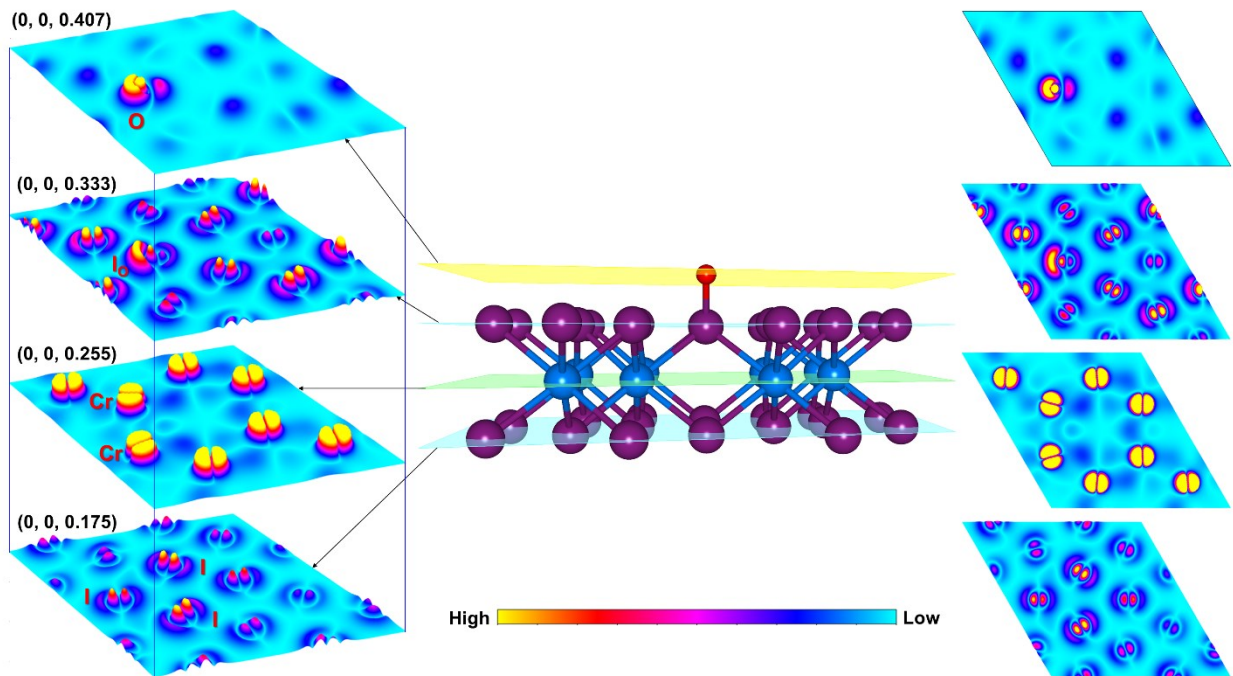

**Fig. S6.** 3D (left panel) and 2D (right panel) contour plots of the charge density for O-attached CrI<sub>3</sub> along the (001) crystallographic directions at  $z = 0.175, 0.255, 0.333,$  and  $0.407$ .

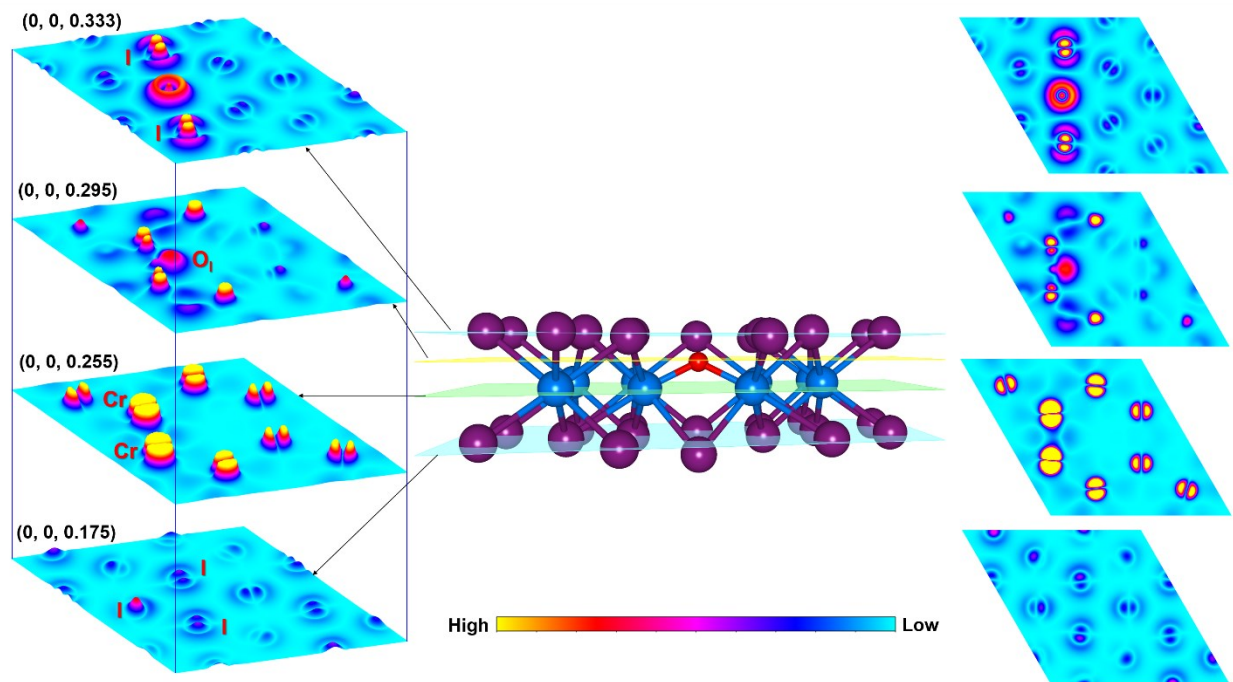

**Fig. S7.** 3D (left panel) and 2D (right panel) contour plots of the charge density for O-doped CrI<sub>3</sub> along the (001) crystallographic directions at  $z = 0.175, 0.255, 0.295,$  and  $0.333$ .

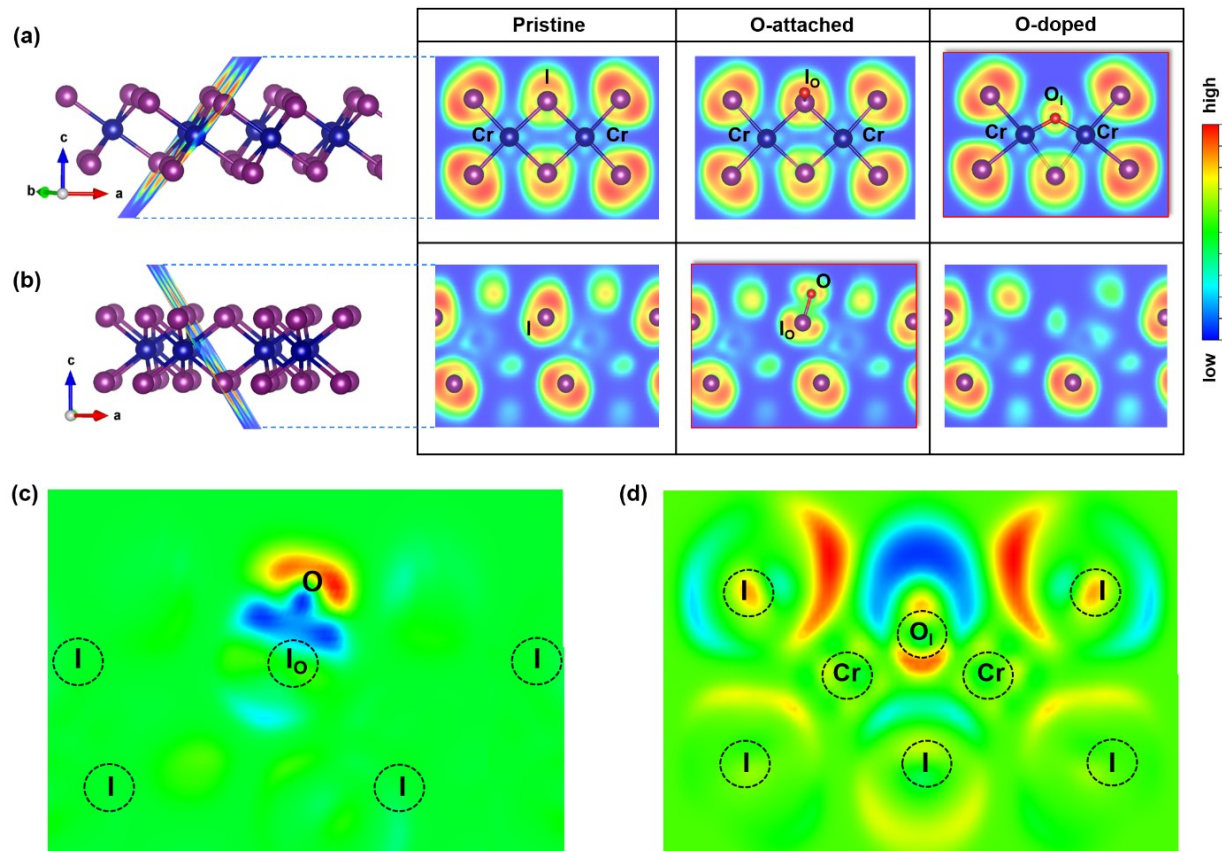

**Fig. S8.** The electron localization function (ELF) profile provides the change of charge density distribution. ELF maps of all investigated CrI<sub>3</sub> monolayers are along (a)  $[-2\ 1\ 2]$  and (b)  $[1\ 0\ 1]$  crystallographic planes. This result reveals that the ELF map along  $[-2\ 1\ 2]$  plane is nearly identical in both the pristine and O-attached monolayer whereas the ELF map is different in the O-doped monolayer. Moreover, (c-d) illustrate the ELF difference ( $\Delta^{\text{ELF}}$ ) of O-attached monolayer along  $[-2\ 1\ 2]$  plane and O-doped along  $[1\ 0\ 1]$  plane, where the dashed-circle represents the preferred location of atoms at the selected slice. Notably, **Fig. S8c** displays that the  $I_{\text{O}}$ -atom lost the noticeable amount of charges to the O-atom while the ELF on the rest of Cr- and I-atoms remain unchanged in O-attached monolayer, indicating that the O-dangling locally affects its neighboring  $I_{\text{O}}$ -atom, but less the CrI<sub>3</sub> monolayer. Meanwhile, **Fig. S8d** shows that there is weak but obvious charge accumulation between Cr-O<sub>1</sub>-Cr atoms in O-doped monolayer.

**Table. S1** Length (L) and the corresponding angle ( $\angle$ ) between other Cr- I (O) bonds surrounding the reference unit discussed in the manuscript.

|                 | Configuration                                                                                                                                                                                                                                                            | Pristine CrI <sub>3</sub>                                                                | O-attached CrI <sub>3</sub>                                                              | O-doped CrI <sub>3</sub>                                                                  |
|-----------------|--------------------------------------------------------------------------------------------------------------------------------------------------------------------------------------------------------------------------------------------------------------------------|------------------------------------------------------------------------------------------|------------------------------------------------------------------------------------------|-------------------------------------------------------------------------------------------|
| Geometry        |                                                                                                                                                                                                                                                                          | 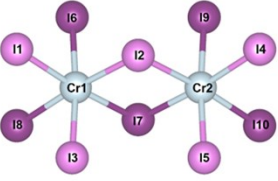        |        |        |
| Bond angle (°)  | $\angle(I_1-Cr_1-I_2/O)$<br>$\angle(I_2/O-Cr_1-I_3)$<br>$\angle(I_3-Cr_1-I_1)$<br>$\angle(I_1-Cr_1-I_8)$<br>$\angle(I_2/O-Cr_1-I_6)$<br>$\angle(I_1-Cr_1-I_7)$<br>$\angle(I_2/O-Cr_1-I_8)$<br>$\angle(I_8-Cr_1-I_7)$<br>$\angle(I_6-Cr_1-I_7)$<br>$\angle(I_6-Cr_1-I_8)$ | 90.03<br>90.03<br>90.03<br>93.39<br>93.39<br>175.29<br>175.29<br>90.01<br>90.01<br>90.01 | 89.72<br>89.44<br>89.46<br>94.84<br>91.02<br>175.28<br>174.11<br>91.33<br>90.55<br>92.29 | 103.22<br>92.9<br>85.29<br>88.02<br>102.37<br>166.17<br>173.23<br>86.68<br>92.91<br>86.88 |
| Bond length (Å) | $L(Cr_1-I_1)$<br>$L(Cr_1-I_3)$<br>$L(Cr_1-I_6)$<br>$L(Cr_1-I_8)$                                                                                                                                                                                                         | 2.74<br>2.74<br>2.74<br>2.74                                                             | 2.74<br>2.73<br>2.73<br>2.74                                                             | 2.78<br>2.76<br>2.72<br>2.94                                                              |

## References:

- [S1]. A.S. Dobrota, I.A. Pašti, S. V. Mentus, and N.V. Skorondumova. *Phys.Chem.Chem.Phys.*, 2017, **19**, 8530.
- [S2]. A. Dabral, A. K. A. Lu, D. Chiappe, M.Houssa, and G. Pourtois, *Phys.Chem.Chem.Phys.*, 2019, **21**, 1089.
- [S3]. G. Wang, R. Pandey, and S.P. Karna. *Nanoscale*, 2015, **7**, 524.
- [S4]. S. KC, R. C. Longo, R. M. Wallace, and K. Cho. *J. Appl. Phys.*, 2015, **117**, 135301.
- [S5]. L. Wang, T. Maxisch, and G. Ceder. *Phys. Rev. B.*, 2006, **73**, 195107.
- [S6]. A. Jain, G. Hautier, S. P. Ong, C. J. Moore, C. C. Fischer, K. A. Persson, and G. Ceder. *Phys. Rev. B.*, 2011, **84**, 045115.
- [S7]. Y. Zhao, L. Lin, Q. Zhou, Y. Li, S. Yuan, Q. Chen, S. Dong, and J. Wang. *Nano Lett.*, 2018, **18**, 2943–2949.
